# Supplementary material for: Anti-SMN autoantibodies in mixed connective tissue disease are associated with a severe systemic sclerosis phenotype
Source: PubMed Central journal article supplement — RMD Open. 2023 Oct 4;9(4):e003431. doi: 10.1136/rmdopen-2023-003431 (PMC10551952; doi:10.1136/rmdopen-2023-003431), 2023-10-04
Supplement: rmdopen-2023-003431supp001.pdf [file rmdopen-2023-003431supp001.pdf]

**Supplemental Figure 1. Representative immunoprecipitation in 9 patients (lanes 1-9) with anti-U1RNP+ MCTD and myositis, including 4 patients with lower GI involvement.<sup>6</sup>**

Samples in lanes 1,2,6,8,9 had high-titer (>4000 MFI) anti-SMN aAbs. (Panel A 8% gel; Panel B 13% gel)

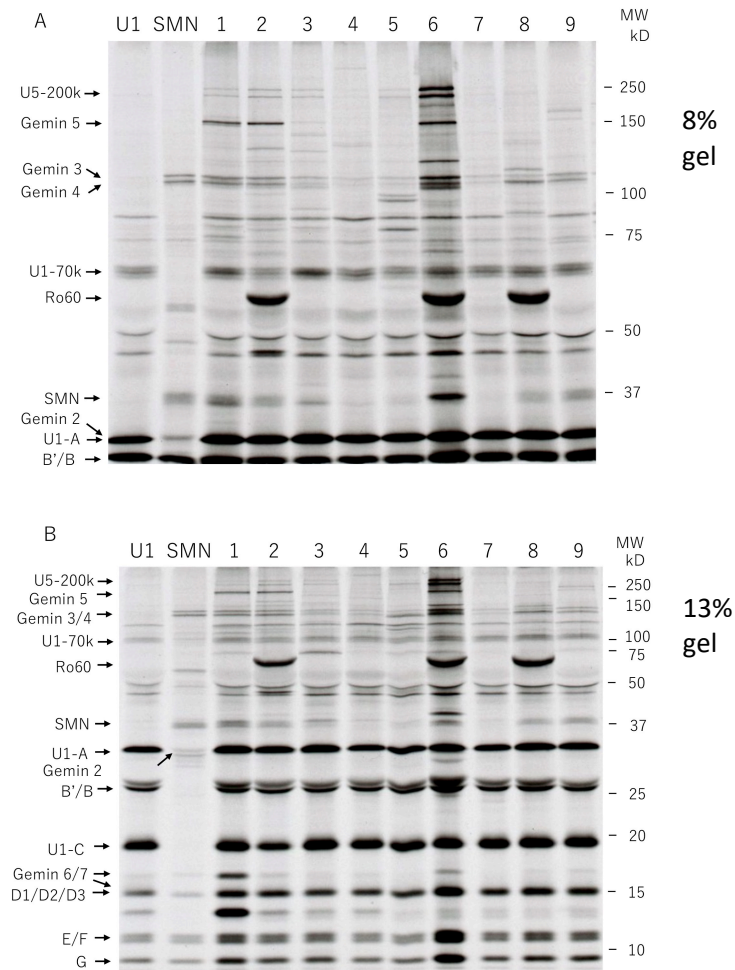

aAbs: autoantibodies; GI: gastrointestinal; MCTD: mixed connective tissue disease; MFI: mean fluorescence intensity; RNP: ribonucleoprotein; SMN: survival of motor neuron
