# Supplementary material for: Anti-SMN autoantibodies in mixed connective tissue disease are associated with a severe systemic sclerosis phenotype
Source: PubMed Central journal article supplement — RMD Open. 2023 Oct 4;9(4):e003431. doi: 10.1136/rmdopen-2023-003431 (PMC10551952; doi:10.1136/rmdopen-2023-003431), 2023-10-04
Supplement: rmdopen-2023-003431supp002.pdf [file rmdopen-2023-003431supp002.pdf]

**Supplemental Table 1. Cumulative features of SLE and SS in anti-SMN+ compared to anti-SMN- MCTD patients**

|                                          | All patients<br>(n=66) | MCTD anti-<br>SMN +<br>(n=39) | MCTD anti-<br>SMN –<br>(n=27) |
|------------------------------------------|------------------------|-------------------------------|-------------------------------|
| SLE features, n (%)                      |                        |                               |                               |
| Fever                                    | 23 (35)                | 14 (36)                       | 9 (33)                        |
| Leukopenia                               | 27 (41)                | 16 (41)                       | 11 (41)                       |
| Thrombocytopenia                         | 11 (17)                | 6 (15)                        | 5 (19)                        |
| Autoimmune hemolysis                     | 2 (3)                  | 2 (5)                         | 0 (0)                         |
| Neuropsychiatric lupus                   | 3 (5)                  | 1 (3)                         | 2 (7)                         |
| Aseptic meningitis                       | 2 (3)                  | 1 (3)                         | 1 (4)                         |
| Muco-cutaneous symptoms                  |                        |                               |                               |
| Non-scarring alopecia                    | 24 (36)                | 13 (33)                       | 11 (41)                       |
| Oral ulcers                              | 23 (35)                | 16 (41)                       | 7 (26)                        |
| Subacute or discoid lupus                | 4 (6)                  | 4 (10)                        | 0 (0)                         |
| Acute cutaneous lupus                    | 29 (44)                | 18 (46)                       | 11 (41)                       |
| Cutaneous vasculitis / Livedo            | 23 (35)                | 15 (38)                       | 8 (30)                        |
| Serositis                                | 34 (52)                | 21 (54)                       | 13 (48)                       |
| Arthritis                                | 61 (92)                | 35 (90)                       | 26 (96)                       |
| Renal involvement                        | 9/65 (14)              | 6/38 (16)                     | 3 (11)                        |
| Positive antiphospholipid antibody       | 18/51 (35)             | 12/29 (41)                    | 6/22 (27)                     |
| Thromboembolic events                    | 5 (8)                  | 3 (8)                         | 2 (7)                         |
| SS features, n (%)                       |                        |                               |                               |
| Xerophthalmia                            | 31/38 (82)             | 20/25 (80)                    | 11/13 (85)                    |
| Xerostomia                               | 34/41 (83)             | 22/26 (85)                    | 12/15 (80)                    |
| Parotid gland swelling                   | 18 (27)                | 12 (31)                       | 6 (22)                        |
| Positive labial salivary gland biopsy    | 5/6 (83)               | 1/2 (50)                      | 4/4 (100)                     |
| Ocular staining score $\geq 5$           | 7/9 (78)               | 5/5 (100)                     | 2/4 (50)                      |
| Schirmer test <5mm/5min                  | 9/13 (69)              | 3/5 (60)                      | 6/8 (75)                      |
| Unstimulated saliva flow rate <0.1mL/min | 8/13 (62)              | 5/7 (71)                      | 3/6 (50)                      |
| Positive anti-SSA antibody               | 27 (41)                | 19 (49)                       | 8 (30)                        |
| Positive anti-SSB antibody               | 12 (18)                | 9 (23)                        | 3 (11)                        |

MCTD: mixed connective tissue disease; RNP: ribonucleoprotein; SLE: systemic lupus erythematosus; SMN: survival of motor neuron; SS: Sjögren syndrome
